# Supplementary material for: Benzoxazinoids in Root Exudates of Maize Attract Pseudomonas putida to the Rhizosphere
Source: PLoS One. 2012 Apr 24;7(4):e35498. doi: 10.1371/journal.pone.0035498 (PMC3335876; doi:10.1371/journal.pone.0035498)
Supplement: Table S1 — Functional annotation of Pseudomonas putida KT2440 genes with a statistically significant induction at 1 h after exposure to 5 µg mL−1 DIMBOA. Presented are 36 genes with annotated functions out of a total of 55 DIMBOA-inducible genes. (XLSX) [file pone.0035498.s001.xlsx]

## Sheet: Sheet1
Table I. Functional annotation of Pseudomonas putida KT2440 genes with a statistically significant induction at 1 h after exposure to 5 µg mL-1 DIMBOA. The 36 genes with annotated functions out of a total of 55 DIMBOA-inducible genes are listed.
Locus	Gene Name	Product Name	Class
TRANSCRIPTION
PP0387	rpoD	RNA polymerase sigma factor, RpoD	Transcription: transcription factors
PP3617	catR	LysR family transcriptional regulator	Regulatory functions: DNA interactions
PP4546	hrpA	ATP-dependent helicase, HrpA	Transcription: other
PP4553		RNA polymerase sigma-70 factor, ECF subfamily	Transcription: transcription factors
PP4602		AraC family transcriptional regulator	Regulatory functions: DNA interactions
PP4722	greA	Transcription elongation factor, GreA	Transcription: transcription factors
PP4929		LysR family transcription regulator	Regulatory functions: DNA interactions
ENERGY METABOLISM
PP0256*		Molybdopterin oxidoreductase subunit alpha	Metabolism; Energy metabolism; electron transport
PP4121*	nuoCD	Bi-functional NADH:ubiquinone oxido-reductase, subunit C/D	Metabolism; Energy Metabolism; Oxidative phosphorylation; Electron transport
PP4124*	nuoG	NADH-quinone oxido-reductase, subunit G	Metabolism; Energy Metabolism; Oxidative phosphorylation; Electron transport
PP4434	dadA-1	D-amino acid dehydrogenase small subunit	Metabolism; Energy Metabolism; Nitrogen metabolism
PP4540*		α/β fold hydrolase family
PP4551*		α/β fold hydrolase family
PP4661*		NAD(P)H dehydrogenase (quinone)
PP4690*		Rieske (2Fe-2S) domain-containing protein	Metabolism; Energy metabolism; electron transport
PP4947	putA	Tri-functional transcriptional regulator/ proline dehydrogenase/pyrroline-5-carboxylate dehydrogenase	Metabolism; Amino Acid Metabolism; Arginine and proline metabolism
PP5004		Poly(3-hydroxyalkanoate) depolymerase	Metabolism; Energy metabolism; other
TRANSPORT AND BINDING
PP0281		Polar amino acid ABC transporter inner membrane subunit	Transport and binding proteins; amino acids, peptides and amines
PP2241		Major facilitator family transporter	Transport and binding proteins; unknown substrate
PP2604*		Major facilitator family transporter (shares homology with pcaK)	Transport and binding proteins; unknown substrate
PP5206		Secretion protein, HlyD family protein	Transport and binding proteins; unknown substrate
OTHER DNA AND RNA PROCESSES
PP4708	pnp	Polynucleotide phosphorylase / polyadenylase	Genetic Information Processing; Folding, Sorting and Degradation; RNA degradation
PP4812		3-methyladenine DNA glycosylase	Genetic Information Processing; Replication and Repair; Base excision repair
PP4997	pyrR	Bi-functional pyrimidine regulatory protein PyrR, uracil phosphor-ribosyltransferase	Metabolism; Nucleotide Metabolism; Pyrimidine metabolism
PP5286	dut	Deoxyuridine 5'-tri-phosphate nucleotido-hydrolase	Metabolism; Nucleotide Metabolism; Pyrimidine metabolism
PP5296	gmk	Guanylate kinase	Metabolism; Nucleotide Metabolism; Purine metabolism
CHEMOTAXIS AND MOTILITY
PP4340	cheY	Two-component system, chemotaxis family, response regulator, CheY	Environmental Information Processing; Signal Transduction; Chemotaxis
PP4888		Methyl-accepting chemotaxis sensory transducer
OTHER CELLULAR PROCESSES
PP3446	ilvA-1	Threonine dehydratase	Metabolism; Amino Acid Metabolism; Glycine, serine and threonine metabolism. Metabolism; Amino Acid Metabolism; Valine, leucine and isoleucine biosynthesis
PP4315		PhzF family phenazine biosynthesis protein
PP4830	cobL	Precorrin-6Y C5,15-methyl-transferase subunit, CbiE	Metabolism; Metabolism of Cofactors and Vitamins; Porphyrin and chlorophyll metabolism
PP4874	rplI	50S ribosomal protein, L9	Genetic Information Processing; Translation; Ribosome
PP5000	hslV	ATP-dependent protease peptidase subunit: Heat shock protein	Cellular processes; adaptations to atypical conditions
PP5110	ftsE	Cell division ATP-binding protein, FtsE	Environmental Information Processing; Membrane Transport; ABC transporters
PP5226		Lppl family lipoprotein
PP5398		ISPpu14 transposase Orf1	Transposition; DNA mediated. DNA binding. Transposase activity
* DIMBOA-inducible genes with predicted functions in metabolism and transport of N-heteroaromatic compounds. See text for details.
